# Supplementary material for: Superionically conducting β′′-Al2O3 thin films processed using flame synthesized nanopowders
Source: Royal Society of Chemistry journal article supplement (doi:10.1039/c8ta02907e), 2018-01-01
Supplement: c8ta02907e1.pdf [file c8ta02907e1.pdf]

## Supplementary Information

### Superionically Conducting $\beta''$ -Al<sub>2</sub>O<sub>3</sub> Thin Films Processed Using Flame Synthesized Nanopowders

Eongyu Yi,\* Eleni Temeche, and Richard M. Laine\*

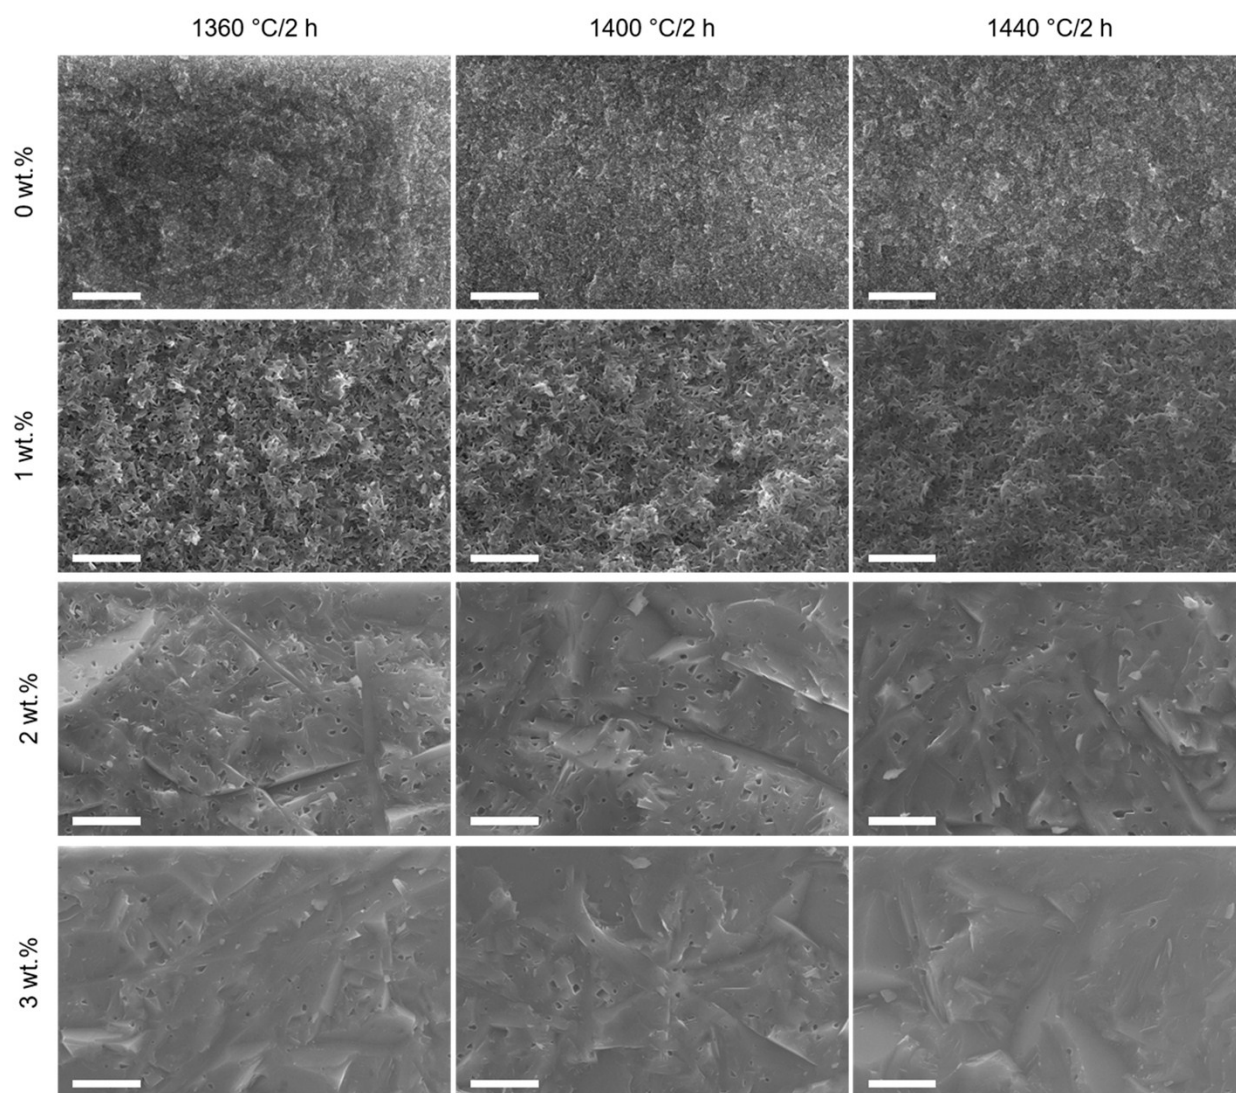

Fig. S1. Low mag. SEM fracture surface images of NAMO-xTiO<sub>2</sub> (x= 0, 1, 2, 3) sintered to selected temperatures (Scale bar = 10 μm).

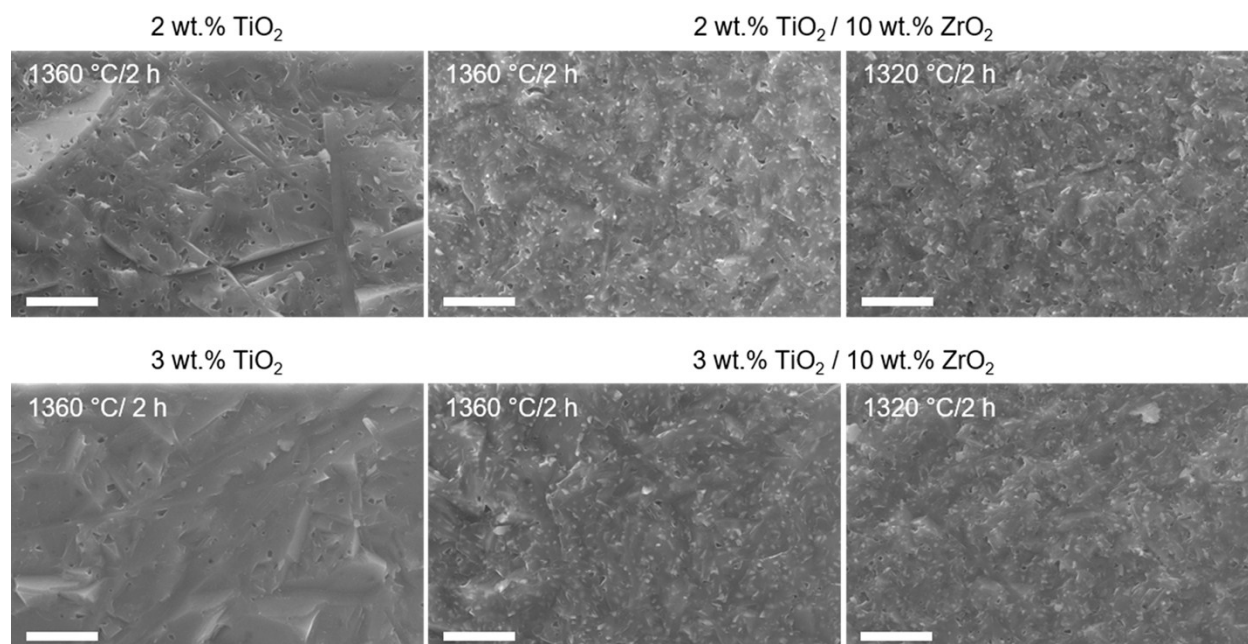

**Fig. S2.** Low mag. SEM fracture surface images of sintered NAMO- $x\text{TiO}_2$ -10ZrO<sub>2</sub> ( $x=2, 3$ ) (Scale bar = 10  $\mu\text{m}$ ).

**Table S1.** Phase fractions of sintered NAMO- $x\text{TiO}_2$ -10ZrO<sub>2</sub> ( $x=2, 3$ ).

|                                            | Sintering schedule | $\beta''$ fraction [wt.%] | $\beta$ fraction [wt.%] | t-ZrO <sub>2</sub> fraction [wt.%] | m-ZrO <sub>2</sub> fraction [wt.%] |
|--------------------------------------------|--------------------|---------------------------|-------------------------|------------------------------------|------------------------------------|
| NAMO-2TiO <sub>2</sub>                     | 1360 °C/2 h        | 65.4±0.9                  | 34.6±0.6                | -                                  | -                                  |
| NAMO-2TiO <sub>2</sub> -10ZrO <sub>2</sub> | 1360 °C/2 h        | 82.3±0.9                  | 4.1±0.4                 | 11.0±0.2                           | 2.6±0.1                            |
|                                            | 1320 °C/2 h        | 83.5±0.9                  | 3.4±0.4                 | 10.7±0.2                           | 2.3±0.1                            |
| NAMO-3TiO <sub>2</sub>                     | 1360 °C/2 h        | 58.4±0.9                  | 41.6±0.7                | -                                  | -                                  |
| NAMO-3TiO <sub>2</sub> -10ZrO <sub>2</sub> | 1360 °C/2 h        | 61.0±0.9                  | 28.0±0.7                | 9.0±0.2                            | 2.0±0.1                            |
|                                            | 1320 °C/2 h        | 70.0±0.8                  | 18.7±0.5                | 9.7±0.1                            | 1.5±0.1                            |
